# 1 Raman spectroscopy-based measurements of 2 single-cell phenotypic diversity in microbial 3 communities

4 Cristina García-Timmermans<sup>a</sup>, Ruben Props<sup>a</sup>, Boris Zacchetti<sup>b</sup>, Myrsini Sakarika<sup>a</sup>, Frank Delvigne<sup>b</sup> and  
5 Nico Boon<sup>a</sup>

6 <sup>a</sup>Center for Microbial Ecology and Technology (CMET), Faculty of Bioscience Engineering, Ghent University, Coupure Links  
7 653, B-9000, Gent, Belgium

8 <sup>b</sup>TERRA research and teaching centre, Microbial Processes and Interactions (MiPI), Université de Liège - Gembloux Agro-  
9 Bio Tech, Avenue de la Faculté, 2B B-5030 Gembloux, Belgium

10 **Keywords:** Raman spectroscopy, microbial population, stress, phenotypic diversity, single-cell  
11 analysis, Hill numbers, *Escherichia coli*, *Saccharomyces cerevisiae*.

## 12 Abstract

13 Microbial cells experience physiological changes due to environmental change, such as pH and  
14 temperature, the release of bactericidal agents, or nutrient limitation. This, has been shown to affect  
15 community assembly and other processes such as stress tolerance, virulence or cell physiology.  
16 Metabolic stress is one such physiological changes and is typically quantified by measuring community  
17 phenotypic properties such as biomass growth, reactive oxygen species or cell permeability. However,  
18 community measurements do not take into account single-cell phenotypic diversity, important for a  
19 better understanding and management of microbial populations. Raman spectroscopy is a non-  
20 destructive alternative that provides detailed information on the biochemical make-up of each  
21 individual cell.

22 Here, we introduce a method for describing single-cell phenotypic diversity using the Hill diversity  
23 framework of Raman spectra. Using the biomolecular profile of individual cells, we obtained a metric  
24 to compare cellular states and used it to study stress-induced changes. First, in two *Escherichia coli*  
25 populations either treated with ethanol or non-treated. Then, in two *Saccharomyces cerevisiae*  
26 subpopulations with either high or low expression of a stress reporter. In both cases, we were able to  
27 quantify single-cell phenotypic diversity and to discriminate metabolically stressed cells using a  
28 clustering algorithm. We also described how the lipid, protein and nucleic acid composition changed  
29 after the exposure to the stressor using information from the Raman spectra. Our results show that  
30 Raman spectroscopy delivers the necessary resolution to quantify phenotypic diversity within  
31 individual cells and that this information can be used to study stress-driven metabolic diversity in  
32 microbial communities.

## 33 Importance

34 Microbes that live in the same community respond differently to stress. This phenomenon is known  
35 as phenotypic diversity. Describing this plethora of expressions can help to better understand and  
36 manage microbial processes. However, most tools to study phenotypic diversity only average the  
37 behaviour of the community. In this work, we present a way to quantify the phenotypic diversity of  
38 single cells using Raman spectroscopy – a tool that can describe the molecular profile of microbes. We  
39 demonstrate how this tool can be used to quantify the phenotypic diversity that arises after the  
40 exposure of microbes to stress. We also show its potential as an ‘alarm’ system to detect when  
41 communities are changing into a ‘stressed’ type.

## 42 Introduction

43 Monoclonal microbial populations can exhibit heterogeneous genetic expression, which underlies  
44 phenotypic differences between cells. Phenotypic diversity has been shown to increase population  
45 survival or fitness in a changing environment and allows microorganisms to divide tasks and organize  
46 as a group. This differential gene expression can arise due to environmental pressure, stochastic  
47 events, periodic oscillations or cell-to-cell interactions (Ackermann, 2015; Altschuler & Wu, 2010;  
48 Avery, 2006). When a deviation from optimal growth conditions occurs such as changes in  
49 temperature, pH, nutrients salts and/or oxygen levels, a stress response is triggered in microorganisms  
50 (both prokaryotes and eukaryotes), resulting in a biochemical cascade to promote stress tolerance,  
51 virulence or other physiological changes. These strategies can result in enhanced survival, virulence,  
52 cross-protection or cell death (Ron, 2013; Świąciło, 2016; Wesche et al., 2009). Usually,  
53 microorganisms show mixed behavioural strategies, maximizing the chances of survival (Lowery et al.,  
54 2017), making phenotypic diversity a crucial characteristic of stress-driven phenotypes. However,  
55 cellular stress is often measured at the community level using bulk technologies, such as cell  
56 concentration, quantity of reactive oxygen species (ROS), cell permeability or protein content. While  
57 these methods reveal important information, they provide the average information for the whole  
58 population, failing to describe cell-to-cell variability and bet-hedging strategies (Veening et al., 2008).  
59 To better understand stress-driven changes, single cell technologies must be used.

60 There are several single cell technologies available to study the response of individual cells to stress.  
61 For example, fluorescent labels that tag certain cellular functions (membrane potential, intracellular  
62 enzyme activity, a stress reporter) can be used in combination with flow cytometry (Delvigne et al.,  
63 2015; Porter et al., 1995) or imaging techniques (Benomar et al., 2015). Single-cell (multi)-omics opens  
64 the door to a very detailed understanding of the metabolism of individual cells, although it is a low-  
65 throughput technique that still presents many challenges in its accuracy (Bock et al., 2016). Raman  
66 spectroscopy is an alternative single-cell tool that can detect individual phenotypes without the use  
67 of fluorescent probes. It is an optical method in which the Raman scattering of a cell and/or particle is  
68 collected thereby generating a single-cell fingerprint that contains (semi)quantitative information on  
69 its constituent molecules, such as nucleic acids, proteins, lipids and carbohydrates. This technique has  
70 been used to study stress-induced phenotypic differences of the cyanobacterium *Synechocystis* sp.  
71 (Tanniche et al., 2020): the fingerprints of cells treated with different concentrations of acetate or  
72 NaCl and non-treated cells were differentiable using discriminant analysis of principal component  
73 analysis (PCA). Also, Teng and colleagues (Teng et al., 2016) found that *Escherichia coli* cells exposed  
74 to several antibiotics, alcohols and chemicals had distinct Raman fingerprints. However, there are  
75 currently no quantitative methods to describe phenotypic diversity in single cells using their Raman  
76 spectra.

77 A widely used set of metrics to quantify the diversity of microbial communities are Hill numbers, also  
78 known as the effective number of species, as they express in intuitive units the number of equally  
79 abundant species that are needed to give the same value of the diversity measure. Hill numbers  
80 respect other important ecological principles, such as the replication principle, that states that in a  
81 group with  $N$  equally diverse groups that have no species in common, the diversity of the pooled  
82 groups must be the  $N$  times the diversity of a single group (Chao et al., 2014; Daly et al., 2018). They  
83 are commonly used to quantify microbial diversity based on 16S rRNA sequencing techniques but have  
84 also been applied to flow cytometry yielding similar results (Props et al., 2016). However, phenotypic  
85 diversity at the single-cell level has not yet been described. This would require multiparametric  
86 information of individual cells, something Raman spectroscopy can provide.

87 Quantifying phenotypic diversity at the single-cell level could be useful to follow and manage stress in  
88 bioproduction: to maintain high bioproduction rates, it is important to find or create stress-tolerant  
89 organisms. For instance, in microbial production of alcohol (considered a sustainable alternative  
90 source for chemicals and fuels), one of the major limitations is the toxicity and/or growth inhibition  
91 caused by the alcohol that is produced. The alcohol increases the fluidity of the cell membrane and  
92 causes a disruption on the phospholipid components that inhibits growth and can lead to death. It  
93 also affects nutrient uptake and ion transport. Therefore, there have been efforts in evolutionary and  
94 synthetic engineering to increase alcohol tolerance in several organisms, for example, *E. coli* and *S.*  
95 *cerevisiae*, widely used in bioproduction (Jia et al., 2010).

96 We aim to quantify single-cell phenotypic diversity using Raman spectroscopy, based on the Hill  
97 diversity framework. We described the necessary steps to preprocess Raman spectra and  
98 demonstrate its integration into the Hill diversity framework. The necessary functionalities are also  
99 embedded in the open source MicroRaman package (<https://github.com/CMET-UGent/MicroRaman>).  
100 To illustrate the use of this method, we applied it in two popular strains in bioproduction. First, we  
101 compared an *E. coli* population in stress conditions (cultivated with ethanol) with a control population.  
102 Secondly, we separated two subpopulations of a *S. cerevisiae* culture that was under nutrient-limiting  
103 conditions using a GFP tag and analyzed them using Raman spectroscopy. In both cases, we show how  
104 the stress-induced single-cell phenotypic diversity can be quantified using the Raman spectra of the  
105 single cells, and how this information can be used to detect a shift in the phenotype of the population.  
106 Finally, we use this information to explain how the molecular profile of the cells changes after being  
107 exposed to the stressors.

108

109

## 110 Materials and methods

### 111 Data sets

112 The strains used and the incubation medium are described in Table 1. We did ~450 measurements in  
113 4 axenic cultures using Raman spectroscopy. Samples were cultured at 28°C with 120 rpm orbital  
114 shaking. Each strain was re-cultivated via transferring 10% v/v of active culture in fresh liquid medium  
115 (described in table 1) every 24 to 48h for 2 months. Cultures were harvested by centrifugation at 6603  
116 g for 5 min, washed with 0.1M phosphate buffer saline (PBS) and stored at -4°C until further use.

117 **Table 1:** List of organisms and medium used to grow them

| Organism                                    | Liquid medium                   |
|---------------------------------------------|---------------------------------|
| <i>Cupriavidus necator</i> LMG 1199         | Nutrient broth (Oxoid CM0001)   |
| <i>Methylobacterium extorquens</i> DSM 1338 | Nutrient Broth with 1% methanol |
| <i>Yarrowia lipolytica</i> ATCC 20362       | YM Broth (BD 271120)            |
| <i>Komagataella phaffii</i> ATCC 76273      | Sabouraud Broth (BD 238230)     |

118

### 119 Case studies: single-cell phenotypic diversity quantification in stress-induced 120 phenotypes

121 To test the capacity of the single-cell phenotypic diversity (sc-D<sub>2</sub>) calculation to identify metabolic  
122 changes, we used two case studies. First, we studied two *E. coli* populations that had been grown  
123 together in different conditions: one was treated with ethanol while the other was not. Secondly, a *S.*  
124 *cerevisiae* culture was grown in nutrient limiting conditions, which resulted in differential expression  
125 of the chimeric stress reporter (tagged with eGFP). The two subpopulations (high expressing and low  
126 expressing eGFP) were isolated (Fig 1).

127

#### A CASE STUDY 1 (population resolution): *E. coli*

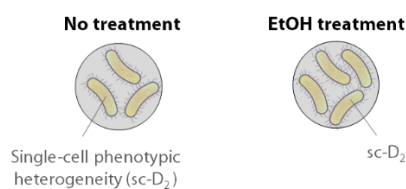

#### B CASE STUDY 2 (subpopulation resolution): *S. cerevisiae*

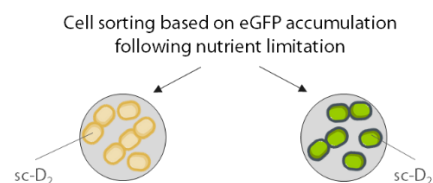

128

129 **Fig 1:** Overview of the case studies. A) Study of two *E. coli* populations grown separately with ethanol in the medium or  
130 non-treated. B) Two subpopulations were isolated from a *S. cerevisiae* culture based on the expression of the GFP marked  
131 chimeric stress reporter after nutrient limitation. The Raman spectra of single cells were used to calculate their phenotypic  
132 diversity (sc-D<sub>2</sub>).

### 133 Population resolution: *E. coli* exposed to ethanol

134 The dataset from Teng et al. 2016 was used to validate alpha and beta-diversity calculations. According  
135 to their manuscript, this dataset consists of Raman spectra of *Escherichia coli* in different time intervals  
136 (5, 10, 20, 30 and 60 min, 3 h and 5 h) after being cultured with different chemical stressors. We used  
137 the ethanol-treated samples and the controls to illustrate our point. The dataset consists of three  
138 biological replicates of the cell culture and measured 20 cells per replicate.

### 139 Subpopulation resolution: *S. cerevisiae* after nutrient limitation

140 The prototrophic haploid yeast strain *Saccharomyces cerevisiae* CENPK 113-7D was used in this study  
141 (Nijkamp et al., 2012). eGFP was produced under the control of a chimeric promoter composed of  
142 fragments of the *HSP26* and *GLC3* promoters. The promoter sequence was previously published  
143 (chimaera 2 in (Zid & O'Shea, 2014)). A synthetic construct containing the promoter, the eGFP gene  
144 and the G418 resistance marker was integrated in the genome via homologous recombination at the  
145 *uga1* site. The correct insertion was confirmed via PCR analysis and lack of growth on gamma-  
146 aminobutyrate (GABA) as the sole nitrogen source.

147 Samples were collected after 10 residence times in a continuous culture operated at  $D=0.1 \text{ h}^{-1}$  in a 2-  
148 liter stirred-tank bioreactor with 1 liter operating volume. Defined yeast mineral medium containing  
149  $7.5 \text{ g l}^{-1}$  was used (Verduyn et al., 1992). The culture temperature was maintained at  $30^\circ \text{ C}$ , the stirrer  
150 speed at 1000 rpm and the air provision at 1 vvm. The culture pH was controlled at 5.0 through the  
151 automated addition of either 25% KOH or 25% M  $\text{H}_3\text{PO}_4$ .

152 Before cell sorting, samples were fixed in formaldehyde 4%, following the protocol from García-  
153 Timermans et al., 2018. Paraformaldehyde is known to preserve the Raman spectral features better  
154 than other fixatives, such as ethanol or glutaraldehyde (Read & Whiteley, 2015). Upon reaching  
155 steady-state in nutrient limited continuous culture, yeast population was sorted in two distinct sub-  
156 populations, i.e. the first one exhibited a high GFP content (high GFP) and the second one exhibiting a  
157 low GFP content (low GFP). Then, the high GFP and low GFP subpopulations were separated using  
158 Fluorescence-activated cell sorting (FACS). For this purpose, cell suspension collected from the  
159 bioreactor was diluted 10 times in PBS (ThermoFischer scientific, Belgium) and was further analyzed  
160 and sorted with a FACSaria (Becton Dickinson, Belgium). Cells have been collected following an  
161 enrichment sorting mode. Fractions containing  $10^6$  cells of each subpopulation were collected. (Gating  
162 details used for cell sorting can be found in Supplementary Information).

### 163 Raman spectroscopy

164 For the *S. cerevisiae* samples, three drops of  $2 \mu\text{L}$  were placed on a  $\text{CaF}_2$  slide (grade 11 mm diameter  
165 by 0.5 mm polished disc, Crystran Ltd.). In each drop, 65 points were measured using a WITec  
166 Alpha300R+ with a 785nm excitation diode laser (Topotica) and a 100x/0.9 NA objective (Nikon) with  
167 40 s of exposure and 1 accumulation using a 300 -mm/g grating.

168 For the samples from *C. necator*, *M. extorquens*, *Y. lipolytica* and *K. phaffi*, ~450 points were measured  
169 using 5 sec of exposure and 1 accumulation with a 300 -mm/g grating.

170 As a control for the instrument performance, a silica gel slide was measured with a grating of 300 –  
171 mm/g, with a 1 s time exposure and 10 accumulations. Laser power was monitored to detect possible  
172 variations. More information can be found in the Raman metadata aid (see Table S1) collected  
173 following the guidelines from García-Timmermans (2018).

### 174 Data analysis

175 The data analysis was conducted using R (R version 3.6.2, R Core Team 3.6.2, 2019) in RStudio version  
176 1.2.1335 (RStudio team, 2019). Plots were produced using the package *ggplot2* and *ggpubr*.  
177 (Kassambara, n.d.; Villanueva et al., 2016).

### 178 Pre-processing

179 We manually eliminated the spectra that contained cosmic rays. The remaining spectra were  
180 preprocessed using the R packages 'MALDIquant' (v1.16.2)(Gibb & Strimmer, 2012) or 'HyperSpec'  
181 (Beleites & Sergo, 2012). To reduce the noise in the spectra, we smoothed it using the *spc.loess()*  
182 function. The  $400\text{-}1800 \text{ cm}^{-1}$  region of the spectrum (which contains the biological information in

183 bacteria) was selected for fingerprint. The baseline was corrected for instrumental fluctuations or  
184 background noise using the Sensitive Nonlinear Iterative Peak (SNIP) algorithm (using ten iterations)  
185 and spectra were normalized using the Total Ion current (TIC). Then, the spectra were normalized  
186 using the *calibrateIntensity()* function and aligned per group with the *alignedSpectra()* function. These  
187 pre-processed data were used to calculate the single-cell phenotypic diversity and principal coordinate  
188 analysis.

189 [Single-cell phenotypic diversity calculation \(sc-D<sub>2</sub>\) for single cells with Raman spectroscopy](#)  
190 The Hill equations were adapted in this manuscript to quantify the phenotypic diversity of single cells  
191 using pre-processed Raman spectra. Every Raman signal corresponds to a single or multiple  
192 metabolite(s), that we have called components (*n*). The relative abundance of each component was  
193 normalized, by calculating their relative abundance. Then, they were used in the Hill equation as  
194 described in the Results section.

195 Hill numbers are commonly used to calculate microbial diversity based on 16S rRNA gene sequencing  
196 techniques but have also been applied to flow cytometry yielding similar results (Props et al., 2016;  
197 Wanderley et al., 2019). Although there are many definitions of alpha diversity, Hill numbers are  
198 widely used. They are also known as the effective number of species, as they express in intuitive units  
199 the number of equally abundant species that are needed to give the same value of the diversity  
200 measure. Hill numbers respect other important ecological principles, such as the replication principle,  
201 that states that in a group with *N* equally diverse groups that have no species in common, the diversity  
202 of the pooled groups must be the *N* times the diversity of a single group. The general Hill equation is:

203 
$$D_n = (\sum n_i)^{1/(1-n)} \quad \mathbf{(1)}$$

204 Where *q* is the sensitivity parameter, known as the order of diversity, that can be 0, 1 or 2. The  
205 diversity index of order 0 (*D*<sub>0</sub>, when *q*=0) corresponds to the species richness (is insensitive to the  
206 species abundance), *D*<sub>1</sub> measures all species by their abundance, and *D*<sub>2</sub> considers both richness and  
207 abundance.

208 
$$D_0 = \sum n_i \quad \mathbf{(2)}$$

209 
$$D_1 = \exp(-\sum \ln n_i) \quad \mathbf{(3)}$$

210 
$$D_2 = \frac{1}{\sum \frac{n}{n_i^2}} \quad \mathbf{(4)}$$

211 More information on the diversity measures used in microbial ecology and the advantages of Hill  
212 numbers can be found in Chao et al., 2014 and Daly et al., 2018.

### 213 [Statistical analysis](#)

214 Normality was studied using *ggdensity()* and *ggqqplot()* from the package 'ggpubr'.

215 Statistics on the phenotypic diversity (sc-D<sub>2</sub>) of ethanol and the control group over time was done  
216 using ANOVA with the function *aov()* and post-hoc testing was done using *Tukey\_HSD()*, both functions  
217 from the package 'stats'.

218 The expression of the biomolecules in the two *S. cerevisiae* subpopulations was analysed using  
219 Wilcoxon test with the function *wilcox.test()* from the package 'stats'.

## 220 Principal coordinate analysis (PCoA)

221 The principal coordinate analysis (PCoA) was calculated as the eigenvalues divided by the sum of the  
222 eigenvalues.

## 223 Sampling size

224 We used a dataset of 4 axenic cultures (described in table 1) and measured ~450 Raman spectra per  
225 sample, for which we calculated their single-cell phenotypic diversity (sc-D<sub>2</sub>). Then, we did 1000  
226 simulations where the data were permuted, and calculated the average D<sub>2</sub> when using an increasing  
227 number of spectra. The average and standard deviation of these 1000 simulations were plotted.

## 228 Subpopulation types

229 Subpopulation types were calculated by adapting the code from flow cytometry data. The method  
230 was originally intended to separate sample clusters, while in its application for Raman spectroscopy  
231 we aim to identify and differentiate cell clusters (Props et al. 2016).

232 First a PCA is performed to reduce the dimensionality of the data. A reduced dataset with the principal  
233 components that explain the majority of the variance (>40%) are used to calculate the optimal number  
234 of clusters using the silhouette index, calculated with the *pam()* function from the package 'cluster'.  
235 Once every cell is assigned to a phenotype, the median phenotype to which the (sub)population  
236 corresponds to is calculated.

## 237 Data availability

238 The analysis pipeline and the raw data can be found in [https://github.com/CMET-](https://github.com/CMET-UGent/Raman_PhenoDiv)  
239 [UGent/Raman\\_PhenoDiv](https://github.com/CMET-UGent/Raman_PhenoDiv)

240

241

242



## 243 Results

### 244 Phenotypic diversity quantification of Raman spectra using Hill numbers

245 Single-cell phenotypic changes can be captured by Raman spectroscopy, by which information is  
246 collected on the (bio)molecules present in individual cells. Once the Raman spectra are acquired, the  
247 raw data need to be pre-processed (**Fig 2- Pre-processing**). This step aims to remove noise from  
248 spectra and to be able to extract meaningful biological information. First, the spectra that contain  
249 cosmic rays need to be removed manually or automatically (Wahl et al., 2020). Then, we select the  
250 spectral region that is most relevant for microbial fingerprinting, around 500-2000  $\text{cm}^{-1}$  (Huang et al.,  
251 2010). Once this region of the spectra is selected, the first step in the pre-processing is to correct the  
252 baseline, that can be degraded due to instrument fluctuations or background-signal influence (Liu et  
253 al., 2015; Wahl et al., 2020). Then, the spectra are normalized to avoid that the absolute intensity  
254 masks the variation of signals of interest (Beattie et al., 2009; Gautam et al., 2015). It is also possible  
255 to align and/or smooth the Raman signal, but these steps can introduce noise to the measurements  
256 and should be carefully considered.

257 After the spectra have been pre-processed, different information can be extracted (**Fig 2-Analysis**).  
258 For example, peaks of interest can be selected for semi-quantitative analysis or quantitative analysis  
259 using a calibration curve (Butler et al., 2016). Also, the whole spectra can be used to classify cells using  
260 several clustering methods, such as principal component analysis, principal coordinate analysis, non-  
261 metric multidimensional scaling or T-distributed stochastic neighbour embedding. This information  
262 can also be used to construct phenotypic trees (Garcia-Timmermans 2018). Here we used the pre-  
263 processed spectra to quantify the single-cell phenotypic diversity using Hill numbers. Every Raman  
264 peak corresponds to a different metabolite or a combination of metabolites, called components ( $x$ )  
265 (**Fig 2**). To calculate the relative abundance of each peak, the intensity of the signal of each component  
266 was normalized by the sum of all intensities, and this information was then used in the Hill equations.

267 The order of diversity ( $q$ ) can be 0, 1 or 2, meaning that richness, abundance or both richness and  
268 abundance are taken into account in the metric.  $\text{sc-D}_0$  contains information about the number of  
269 components ( $n_i$ ) in the Raman spectra, and is calculated as shown in equation 2.  $\text{sc-D}_1$  informs about  
270 the abundance of each component and is described in equation 3. In this paper, we mostly focus on  
271 single-cell  $\text{D}_2$  ( $\text{sc-D}_2$ ) ( $q=2$ ) as it takes both richness and abundance of the Raman components into  
272 account.

273



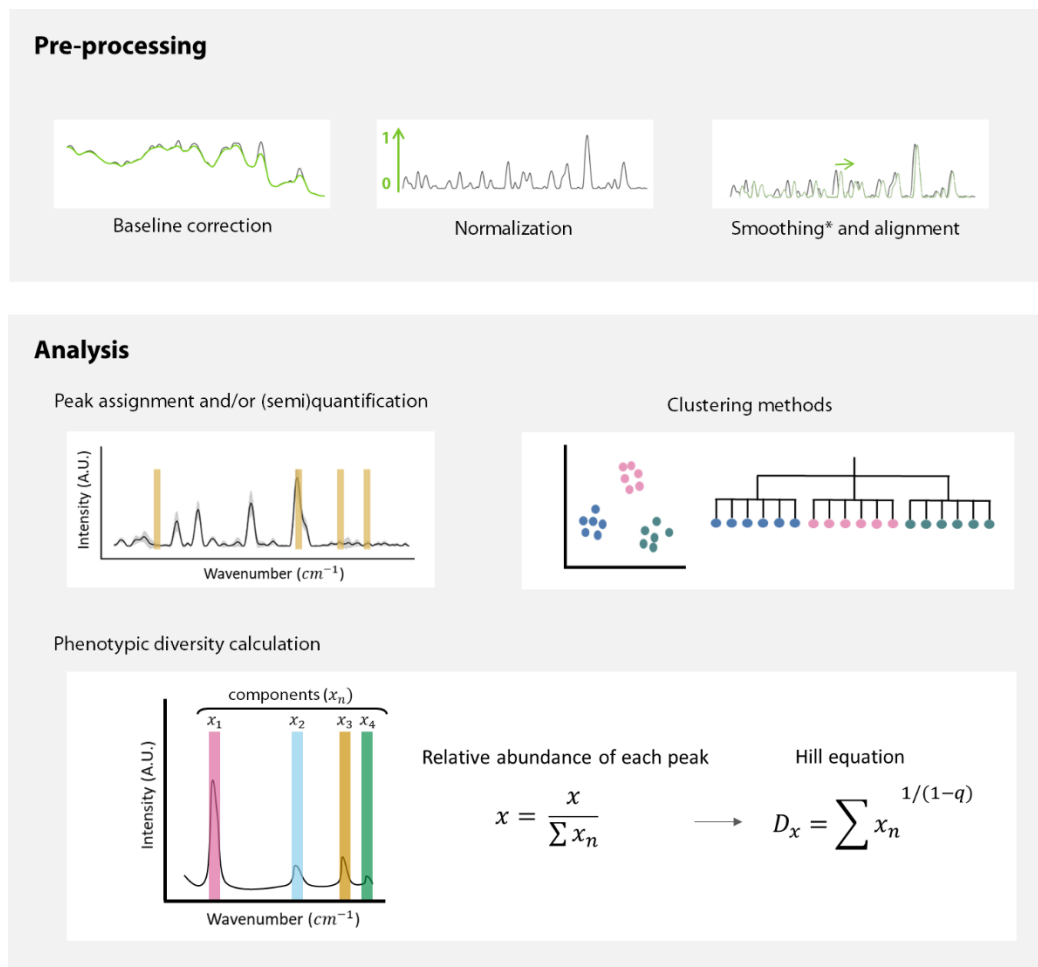

274

275 **Fig 2: Summary of the pre-processing and analysis of the Raman spectra.** First, the baseline is corrected, and the spectra  
276 are normalized. Spectra can be smoothed and aligned; however, smoothing can erase potentially relevant information, and  
277 should be carefully considered. Similarly, alignment can produce faulty spectra by displacing the signal, and thus need to be  
278 used reasonably. Once the spectra are pre-processed, it is possible to (1) extract (semi)quantitative information (2) cluster  
279 cells or create phenotypic trees or (3) calculate the single-cell phenotypic diversity. For the latter, Raman peaks that  
280 correspond to one or several metabolites are considered as components. The intensity of these components ( $x$ ) is used to  
281 quantify phenotypic diversity. The order of diversity ( $q$ ) can be 0, 1 or 2, meaning respectively that richness, abundance or  
282 both parameters are considered in the metric. This equation considers richness and estimated abundance of metabolites in  
283 a single cell.

## 284 Sample size dependence of phenotypic diversity ( $sc-D_2$ ) measurements

285 To understand the distribution of single-cell phenotypic diversity in a population, we did ~450  
286 measurements in 4 axenic cultures of *C. necator*, *M. extorquens*, *Y. lipolytica* and *K. phaffi*. We  
287 calculated the average diversity estimation for an increasing number of spectra and bootstrapped  
288 1000 times. The average of the total number of measurements is plotted in grey, and the 5% of this  
289 average is represented with a dotted grey line.

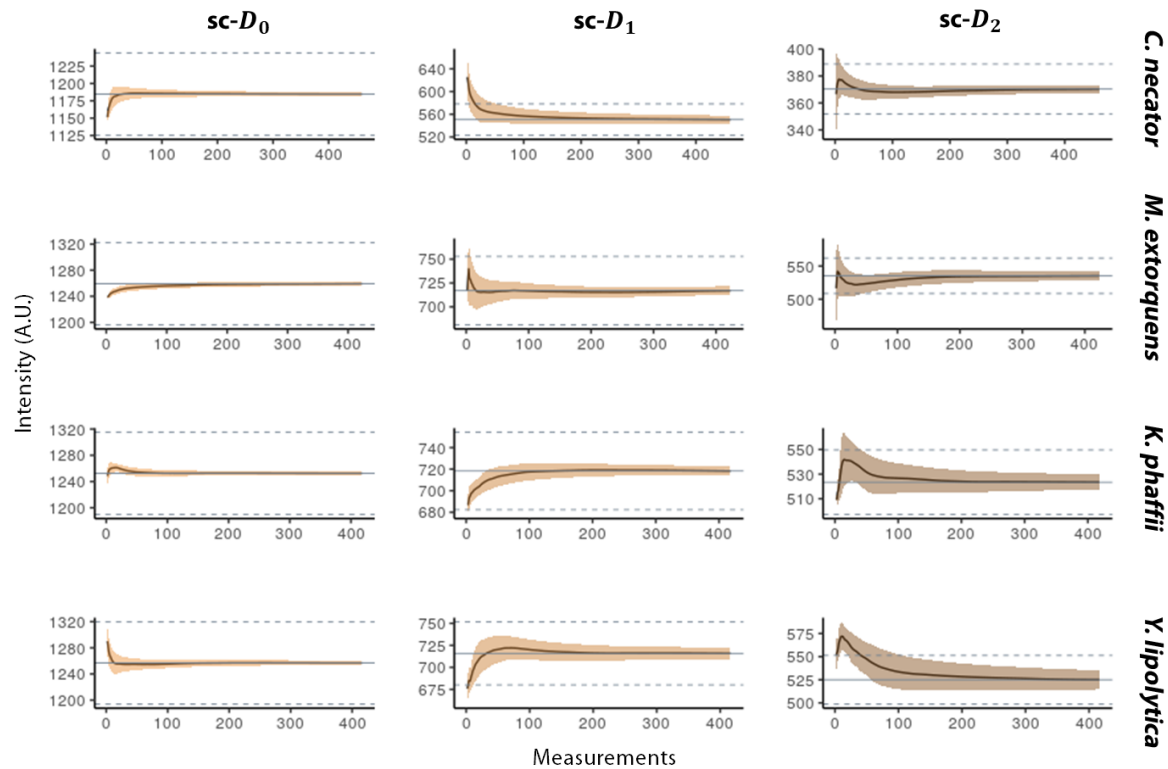

290

291 **Fig 3: Effect of sampling size on the single-cell phenotypic diversity average.** We calculated the average single-cell  
 292 phenotypic diversity using the Hill equations (single-cell  $D_0$ ,  $D_1$  and  $D_2$ ) for an increasing number of measurements and  
 293 repeated the calculation picking spectra randomly 1000 times. We used the Raman spectra of four pure cultures and ~450  
 294 measurements on each. The smear represents the standard deviation. The grey line represents the average sc-D value of the  
 295 total population, and the dashed lines a 5% deviation from the mean.

296 We looked at how many measurements were needed to calculate the population average (grey line)  
 297 and how many are needed to have an accurate estimation (95%, dashed lines). For the estimation of  
 298 sc- $D_0$ , few measurements (~10-50) are needed to obtain the population average. The sc- $D_1$   
 299 calculation grants a greater weight to high-intensity wavenumber and/or peaks of these components,  
 300 and required ~100 measurements. Although *M. extorquens* reaches it after ~20 measurements. The  
 301 sc- $D_2$  estimation takes both the number of components and their abundance into account and needed  
 302 between ~50 (*C. necator*) to ~180 (*Y. lipolytica*) measurements to estimate the population average.

### 303 Case studies: phenotypic diversity quantification in stress-induced phenotypes

304 When stress is applied in a microorganism, a set of genes and proteins are expressed, changing the  
 305 metabolic phenotype of the cell. This metabolic change can be captured by Raman spectroscopy, that  
 306 collects information on the (bio)molecules present in individual cells. To compare stressed and non-  
 307 stressed cells, we quantified their phenotypic diversity using our proposed methodology, as shown in  
 308 **Fig 1**. First, we compared two *E. coli* cultures growing in different conditions: with ethanol (stressed)  
 309 or non-treated (control). Then, we compared two subpopulations of the same *S. cerevisiae* culture,  
 310 separated based on their expression of the GFP stress reporter in nutrient-limiting conditions.

### 311 Tracking *E. coli* population diversification dynamics following exposure to ethanol stress

312 We used a dataset from Teng 2016, consisting of spectra of *Escherichia coli* sampled at different time  
 313 points (5, 10, 20, 30 and 60 min, 3 h and 5 h) after being cultured in standard conditions or with  
 314 ethanol. There were three biological replicates of the cell culture and 20 cells were measured per  
 315 replicate.

316 The stress-induced metabolic diversity of single cells was quantified using the sc-D<sub>2</sub> Hill equation and  
317 the average diversity for each population (stress and non-stressed) was plotted (**Fig 4A**). After testing  
318 for normality, a two-way ANOVA test showed a significant difference between treatments and  
319 treatments over time ( $p < 0.0001$ ). A post-hoc Tukey test showed that the ethanol and control groups  
320 were significantly different at time point 60 min and 180 min ( $p < 0.0001$ ). Then we used PCoA, a  
321 common clustering method to visualize the dissimilarities in the fingerprints. The Raman fingerprint  
322 of the stressed and control cells is similar at the beginning and then shift over time (**Fig 4B**). We used  
323 a clustering algorithm to define exactly when this shift takes place: after 20 min for the ethanol-  
324 treated population and 180 min for the control population (**Fig 4C**).

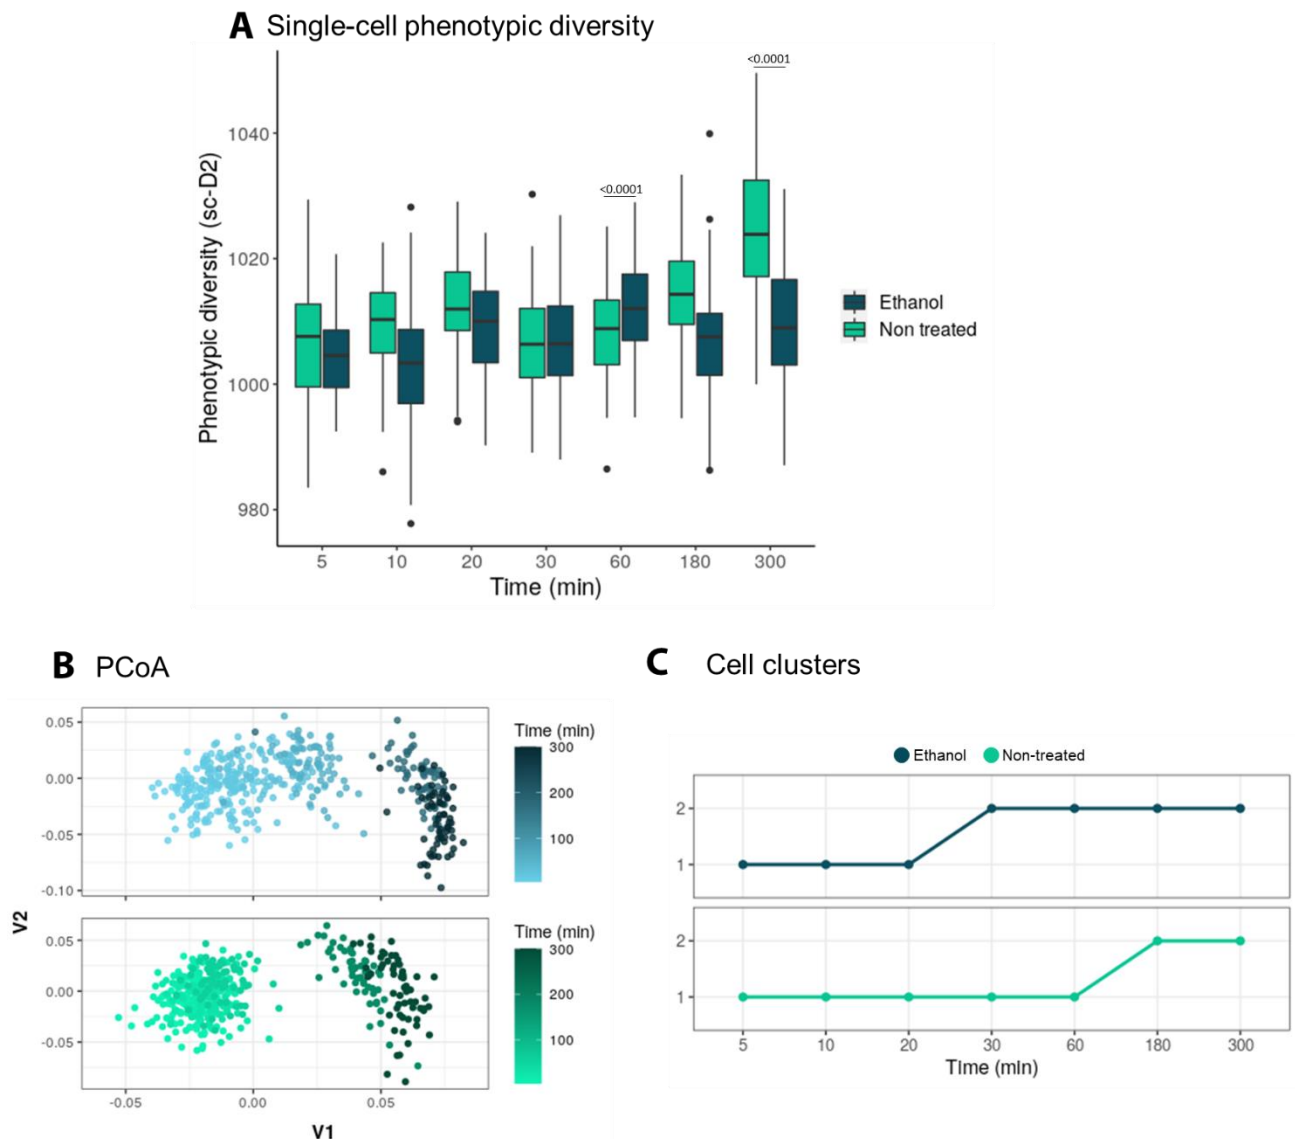

325

326 **Fig 4: A)** Single-cell phenotypic diversity (sc-D<sub>2</sub>) of the stressed (ethanol treated) and non-stressed (non-treated) *E. coli*  
327 populations. Treatments and treatments over time are significantly different (two-way ANOVA,  $p < 0.0001$ ). A post-hoc  
328 Tukey test showed that the ethanol and control groups are significantly different on timepoint 60 min and 180 min ( $p <$   
329  $0.0001$ ). **B)** Raman fingerprint of the stressed (ethanol treated) and non-stressed (non-treated) *E. coli* populations,  
330 plotted using principal component analysis (PCoA). The time progression is represented with a darker colour. Every point represents  
331 a single cell. **C)** The clustering algorithm shows the phenotypic shift happens after 20 min for the ethanol-treated population  
332 and after 180 min for the control. Two phenotypes were found. Every point represents the average “phenotypic type” of the  
333 population. N=60

334 Discriminating *S. cerevisiae* subpopulations following exposure to nutrient limitation  
335 A *S. cerevisiae* population was cultured in nutrient-limiting conditions. Based on GFP expression as an  
336 indicator of stress activation, we separated two subpopulations (one that activated the stress  
337 reporter, and one that did not) using FACS. Then, we analyzed 65 cells in each subpopulation using  
338 Raman spectroscopy.

339 First, we calculated the single-cell phenotypic diversity ( $sc-D_2$ ) of the subpopulations with high (+) or  
340 low(-) stress reporter expression. To prove that  $sc-D_2$  calculations are quantitative, we also created an  
341 *in silico* group by mixing the two subpopulations (**Fig 5A**). The *in silico* mix group was expected to have  
342 an average  $sc-D_2$ . Then, we checked the dissimilarity of the fingerprints using PCoA (**Fig 5B**). Two  
343 clusters are differentiated depending on the reporter expression.

344

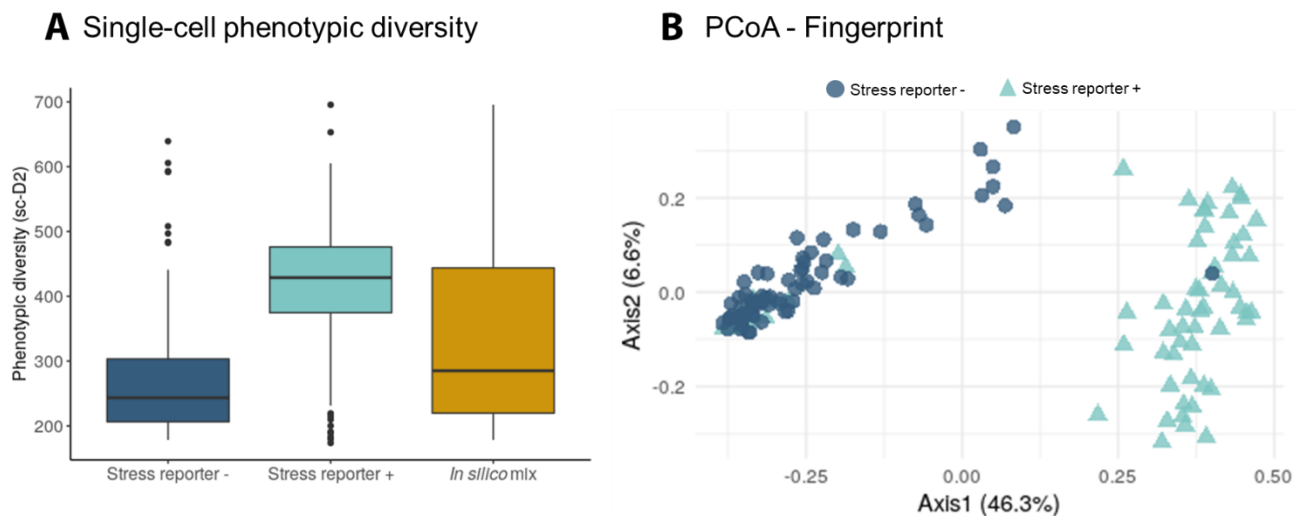

345

346 **Fig 5: A)** Single-cell phenotypic diversity of a *S. cerevisiae* subpopulations with high or low stress reporter expression and an  
347 *in silico* mix of both groups. The *in silico* mix is a random selection of cells coming from the stressed and non-stressed  
348 population **B)** Visualization of the stress-induced phenotypic change of *Saccharomyces cerevisiae* subpopulations with high  
349 or low stress reporter expression using principal coordinates analysis (PCoA). Every dot is a single cell. The size of the dot  
350 corresponds to the single-cell phenotypic diversity ( $sc-D_2$ ). N= 65.

351 The information of the Raman spectra from each group was used to understand the effect of the stress  
352 reporter activation on the metabolic response of *S. cerevisiae*. The intensity of the Raman peaks that  
353 correlate well to the content in proteins, lipids, nucleic acids and unsaturated lipids (Teng *et al.*, 2016)  
354 was compared in the subpopulations with a high or low stress-reporter expression (**Fig 6**). We found  
355 that both groups have a significantly different metabolism: the subpopulation with a high (+)  
356 expression of the stress reporter had more unsaturated lipids and proteins, but contained less lipids  
357 and nucleic acids (Wilcoxon rank-sum test,  $p < 0.0001$ ).

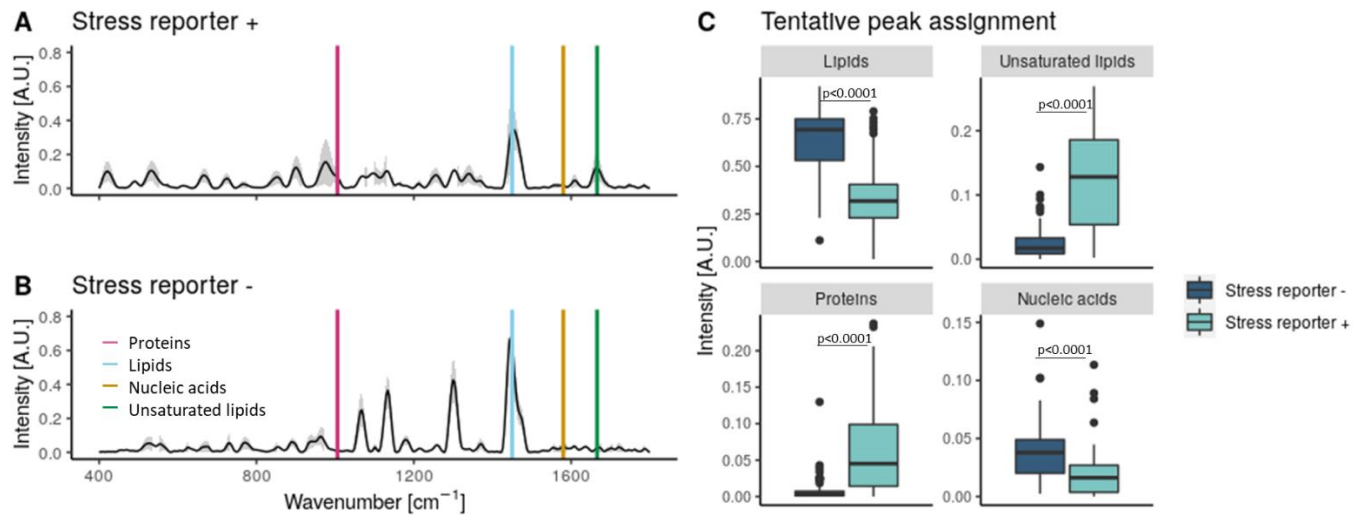

358

359 **Fig 6:** Raman spectra of *S. cerevisiae* subpopulations with high (+) or low (-) expression of the stress reporter (**A,B**). The  
360 average of the spectra is plotted with a black line and the standard deviation in grey. The putative peaks corresponding to  
361 proteins, lipids, nucleic acids and unsaturated lipids according to Teng and colleagues (2016) are plotted over the spectra. **C**)  
362 The intensity of the metabolic peaks highlighted in plot A and B for the subpopulations with high or low expression of the  
363 stress reporter. The  $p$  values for the Wilcoxon test for every metabolite is shown. N=65

364

365

## 366 Discussion

367 Raman spectroscopy can quantify stress-driven metabolic heterogeneity at the single cell level to  
368 detect how and when bacteria diversify their metabolism. This tool is relatively fast and non-  
369 destructive, and can provide (semi)quantitative information about the composition of cells. Once the  
370 spectra are measured, they need to be pre-processed to remove as much noise as possible. First, the  
371 samples with cosmic rays can be removed manually, or the cosmic rays can be subtracted  
372 automatically. Then the baseline is corrected, and spectra are normalized (**Fig 2**), although there is  
373 some discussion as to whether these calculations should be performed in a single step (Liu et al., 2015;  
374 Wahl et al., 2020). There are other possible data transformations, such as the aligning the spectra, to  
375 avoid the small instrumental variations that can show up (García-Timmermans et al., 2018). However,  
376 this step might introduce noise (i.e. by misplacing Raman signals) and should be carefully considered.  
377 Smoothing can be also used, but this step can erase small points in the spectra, removing relevant  
378 information. In our case, we noticed the spectra were noisy, and decided to smooth the spectra. We  
379 also aligned the samples per group, although this had very little effect in the dataset.

380 Once the spectra have been pre-processed, they can be used to investigate the phenotypic  
381 heterogeneity among or within cells. Although Raman spectroscopy has been previously used to  
382 detect stress-driven phenotypes (Tanniche et al., 2020), we argue that there is a need for single-cell  
383 quantitative measurements for phenotypic diversity and propose the use of Hill numbers. We chose  
384 Hill numbers for our calculations because they are widely used in microbial ecology. As previously  
385 stated, they are easy to understand because they represent the effective number of species - the  
386 number of equally abundant species needed to give the same value of diversity measure – and respect  
387 important ecological principles such as monotonicity in the number of species and the replication  
388 principle (Daly et al., 2018).

389 To estimate phenotypic diversity using Hill numbers, we considered that each Raman signal  
390 corresponds to a component (a single or multiple molecules), and that the intensity of these  
391 components is correlated with their quantity (Tang et al., 2013; Wu et al., 2011). After normalizing the  
392 components, they were used in the Hill equations (**Fig 2**). Although we chose to use the whole  
393 spectrum for this calculation, it is possible to select only the peaks. However, this could influence the  
394 resolution: algorithms for peak detection typically divide the spectrum according to a certain window  
395 size and look for the local maximum (Gibb & Strimmer, 2012). Using this algorithm would not take into  
396 account the width of components, which is a characteristic of the molecules. Also, some components  
397 with a close signal would be ignored, and the choice of window size would affect the final result. How  
398 the Raman spectra are preprocessed will have an impact on the results. The region used for  
399 fingerprinting needs to be considered so that all the relevant biomolecules to address the hypothesis  
400 are reported. Both the baseline correction and normalization will have an impact on the intensity  
401 reported for the different components. Smoothing functions assume spectra are noise, and erase  
402 certain signal. Finally, aligning spectra when unnecessary can misplace the signals. Using the same  
403 preprocessing steps when comparing samples is crucial, as well as detailing the preprocessing steps and  
404 providing the raw data.

405 To explore the importance of the sample size in these estimations, we used a large dataset consisting  
406 of ~450 Raman spectra from 2 axenic bacterial cultures (*C. necator* and *M. extorquens*) and 2 axenic  
407 yeast cultures (*Y. lipolytica* and *K. phaffii*). Then, the effect of the sampling size on the average single-  
408 cell phenotypic diversity and its standard deviation was calculated. Our results show that this is highly  
409 population-dependent: for example, while *C. necator* only needed 15 spectra to approach the  
410 expected *sc-D2* average, *Y. lipolytica* needed more than 150 measurements (**Fig 3**). This could be due



411 to a different degree of phenotypic diversity in the populations. Sample size should be explored for  
412 every experiment, to make sure that the estimations are representative.

413 After developing the methodology to quantify single-cell phenotypic diversity, we applied it to two  
414 case studies to demonstrate its use. We focused on sc-D<sub>2</sub>, as it considers how many components are  
415 being expressed per cell, and their abundance. In the first case study, we compared an ethanol-treated  
416 and a control *E. coli* population. We found that when *E. coli* is grown in standard conditions, there is a  
417 phenotypic shift after 60 min. This shift happens earlier in stressed cells (20 min) (**Fig 4C**). The shift in  
418 the fingerprint in the control group could be due to the entering in the log phase. Our group previously  
419 showed how *E. coli* start their log phase after ~1h of cultivation in rich medium, and how at different  
420 growth stages bacteria change their phenotype (García-Timmermans et al., 2019). Although both the  
421 ethanol-treated and the control populations end up having a similar phenotype after 60 min, the  
422 stressed population has a lower metabolic diversity (**Fig 4A**), a lower nucleic acid content and a higher  
423 protein and lipid content. Clustering algorithms are useful to automatically identify phenotypes and  
424 quickly asses when the phenotype of a population has changed in a reproducible way. While here we  
425 use PCA, other metrics can be used, such as non-metric multidimensional scaling (NMDS), t-distributed  
426 Stochastic Neighbor Embedding (t-SNE) and other clustering methods. The choice of the clustering  
427 method should be based on the hypothesis, and how important it is to conserve the distances between  
428 the cells and the relative size of the cluster.

429 In the second case study, we analyzed the response of two *S. cerevisiae* subpopulations. When in  
430 nutrient-limiting conditions, *S. cerevisiae* resorts to a bet-hedging strategy where some yeasts will  
431 enter a quiescent state, while others will activate a stress-induced response (Gray et al., 2004). The  
432 strain used in this experiment produces GFP upon activation of nutritional stress, so when the *S.*  
433 *cerevisiae* culture diversified into two populations -with either high or low expression of the stress  
434 reporter- these were separated using FACS and analyzed with Raman spectroscopy. Because the  
435 Raman spectroscope used has a 785 nm laser, we do not expect the fluorescent signal (excited at 510  
436 nm) to be picked up with this instrument. Single-cell phenotypic diversity (sc- D<sub>2</sub>) in the stressed  
437 subpopulation is higher than the non-stressed (**Fig 5A**). As expected, the *in silico* mix shows a diversity  
438 that is close to the average of both subpopulations. We then checked that the subpopulations with  
439 high and low stress reporter expression had a different fingerprint using PCoA, a tool widely used for  
440 Raman spectra in microbial ecology. This confirmed that the fingerprint of both subpopulations is  
441 visibly different (**Fig 5B**). Using the metabolic information contained in the Raman spectra, we found  
442 a higher nucleic acid content in the non-stressed subpopulation (in line with the findings of Teng 2016  
443 in stressed *E. coli* cells). This could be explained by the higher ribosome content in non-stressed cells.  
444 We also found that the stress response triggered by the activation of the chimeric promoter results in  
445 a raise of protein and unsaturated lipids production (**Fig 6**), similar to the results found in stressed *E.*  
446 *coli* cells. However, it could be that the protein responsible for this difference is (at least partially) the  
447 GFP protein itself. The choice of this promoter based on a fusion of *glc3* and *hsp26* as a single proxy  
448 to define a metabolically stressed population is cross validated by these findings, that show two clearly  
449 metabolically distinct subpopulations.

450 Finally, we explored whether the number of cells measured in both case studies was enough to  
451 capture the diversity of the cultures. In *S. cerevisiae*, 65 cells were enough to estimate single-cell  
452 diversity, and most biomolecules (**Fig S2, Fig S3**). However, to properly estimate the protein content  
453 in the non-stressed subpopulation more cells would have been needed. In the *E. coli* population, we  
454 tested the sample size in the ethanol-treated population at timepoint 5 min and 300 min. Very few  
455 cells are needed to have a representative single-cell diversity estimation: the sc-D<sub>0</sub> is the same for all  
456 cells (**Fig S4**). This metric looks at the number of components present in each cell, which in this case



457 seem to be the same for all individuals. It could be that these cells express the same molecules, but  
458 different amounts, and/or an artefact of the pre-processing carried out by Teng *et al*, that could have  
459 erased some of the smaller peaks. This highlights the importance of making the raw data available,  
460 following the trends of other disciplines such as new generation sequencing (NGS) or flow cytometry.

461 Inferring metabolic expression from Raman spectra in microbial cells is not without challenges. For  
462 instance, many databases propose different peaks to identify the same biomolecules. In this  
463 manuscript, we have chosen those presented in Teng et al. 2016 to be able to compare the results  
464 they found in *E. coli* and we found in *S. cerevisiae*. Some molecules are not Raman active, and thus will  
465 not be reflected in the spectra. Conversely, some Raman active molecules can be overrepresented in  
466 the analysis. Also, there can be Raman peaks that correspond to several compounds. These limitations  
467 should be considered when using Raman spectroscopy for microbial ecology. A better assignment of  
468 the Raman signals will also contribute to an improved understanding of the metabolic changes driving  
469 single-cell phenotypic heterogeneity.

470 Raman spectroscopy is a promising single-cell technology, able to quantify phenotypic diversity in  
471 individual cells, identify changes in phenotypes and estimate metabolic information  
472 (semi)quantitatively. Single-cell tools represent the next challenge of microbial ecologists: they can go  
473 beyond community measurements, based mostly on single marker-gene expression or low-  
474 dimensional physiological data, and shed light on how heterogeneity shapes communities.

## 475 Conclusions

- 476 • Raman spectroscopy can be used to quantify single-cell stress-driven phenotypic diversity in  
477 microbial communities.
- 478
- 479 • Each Raman spectral point corresponds to a different metabolite (or to multiple metabolites),  
480 that are expressed with a certain abundance (intensity). Using this information in the Hill  
481 diversity framework, we can estimate the phenotypic diversity in single cells. We show that  
482 these methods work to study changes at the population and subpopulation level in both  
483 prokaryotes and eukaryotes.
- 484
- 485 • The Raman spectra contain information about the biomolecules present in a cell, and can be  
486 used to study the metabolic shift in stressed cells.
- 487
- 488
- 489 • We propose an automatic classification of phenotypes using clustering methods. This is a  
490 useful tool to track changes in single-cell physiology.
- 491

## 492 Bibliography

- 493 Ackermann, M. (2015). A functional perspective on phenotypic heterogeneity in microorganisms.  
494 *Nature Reviews Microbiology*, 13(8), 497–508. <https://doi.org/10.1038/nrmicro3491>
- 495 Altschuler, S. J., & Wu, L. F. (2010). Cellular heterogeneity: do differences make a difference? *Cell*,  
496 141(4), 559–563. <https://doi.org/10.1016/j.cell.2010.04.033>
- 497 Avery, S. V. (2006). Microbial cell individuality and the underlying sources of heterogeneity. *Nature*  
498 *Reviews Microbiology*, 4(8), 577–587. <https://doi.org/10.1038/nrmicro1460>
- 499 Beattie, J. R., Glenn, J. V., Boulton, M. E., Stitt, A. W., & McGarvey, J. J. (2009). Effect of signal  
500 intensity normalization on the multivariate analysis of spectral data in complex ‘real-world’  
501 datasets. *Journal of Raman Spectroscopy*, 40(4), 429–435. <https://doi.org/10.1002/jrs.2146>
- 502 Beleites, C., & Sergo, V. (2012). hyperSpec: a package to handle hyperspectral data sets in R. *Journal*  
503 *of Statistical Software*.
- 504 Benomar, S., Ranava, D., Cárdenas, M. L., Trably, E., Rafrafi, Y., Ducret, A., Hamelin, J., Lojou, E.,  
505 Steyer, J. P., & Giudici-Orticoni, M. T. (2015). Nutritional stress induces exchange of cell  
506 material and energetic coupling between bacterial species. *Nature Communications*, 6(1), 1–10.  
507 <https://doi.org/10.1038/ncomms7283>
- 508 Bock, C., Farlik, M., & Sheffield, N. C. (2016). Multi-Omics of Single Cells: Strategies and Applications.  
509 In *Trends in Biotechnology* (Vol. 34, Issue 8, pp. 605–608). Elsevier Ltd.  
510 <https://doi.org/10.1016/j.tibtech.2016.04.004>
- 511 Butler, H. J., Ashton, L., Bird, B., Cinque, G., Curtis, K., Dorney, J., Esmonde-White, K., Fullwood, N. J.,  
512 Gardner, B., Martin-Hirsch, P. L., Walsh, M. J., McAinsh, M. R., Stone, N., & Martin, F. L. (2016).  
513 Using Raman spectroscopy to characterize biological materials. *Nature Protocols*, 11(4), 664–  
514 687. <https://doi.org/10.1038/nprot.2016.036>
- 515 Chao, A., Chiu, C.-H., & Jost, L. (2014). Unifying Species Diversity, Phylogenetic Diversity, Functional  
516 Diversity, and Related Similarity and Differentiation Measures Through Hill Numbers. *Annual*  
517 *Review of Ecology, Evolution, and Systematics*, 45(1), 297–324.  
518 <https://doi.org/10.1146/annurev-ecolsys-120213-091540>
- 519 Daly, A., Baetens, J., & De Baets, B. (2018). Ecological Diversity: Measuring the Unmeasurable.  
520 *Mathematics*, 6(7), 119. <https://doi.org/10.3390/math6070119>
- 521 Delvigne, F., Baert, J., Gofflot, S., Lejeune, A., Telek, S., Johanson, T., & Lantz, A. E. (2015). Dynamic  
522 single-cell analysis of *Saccharomyces cerevisiae* under process perturbation: comparison of  
523 different methods for monitoring the intensity of population heterogeneity. *Journal of*  
524 *Chemical Technology & Biotechnology*, 90(2), 314–323. <https://doi.org/10.1002/jctb.4430>
- 525 García-Timmermans, C., Rubbens, P., Kerckhof, F. M., Buyschaert, B., Khalenkow, D., Waegeman, W.,  
526 Skirtach, A. G., & Boon, N. (2018). Label-free Raman characterization of bacteria calls for  
527 standardized procedures. *Journal of Microbiological Methods*, 151(August), 69–75.  
528 <https://doi.org/10.1016/j.mimet.2018.05.027>
- 529 García-Timmermans, C., Rubbens, P., Heyse, J., Kerckhof, F., Props, R., Skirtach, A. G., Waegeman, W.,  
530 & Boon, N. (2019). Discriminating Bacterial Phenotypes at the Population and Single-Cell Level:  
531 A Comparison of Flow Cytometry and Raman Spectroscopy Fingerprinting. *Cytometry Part A*,  
532 cyto.a.23952. <https://doi.org/10.1002/cyto.a.23952>
- 533 Gautam, R., Vanga, S., Ariese, F., & Umapathy, S. (2015). Review of multidimensional data processing  
534 approaches for Raman and infrared spectroscopy. *EPJ Techniques and Instrumentation* 2015

- 535 2:1, 2(1), 1–38. <https://doi.org/10.1140/EPJTI/S40485-015-0018-6>
- 536 Gibb, S., & Strimmer, K. (2012). MALDIquant: a versatile R package for the analysis of mass  
537 spectrometry data. *Bioinformatics*, 28(17), 2270–2271.  
538 <https://doi.org/10.1093/bioinformatics/bts447>
- 539 Gray, J. V., Petsko, G. A., Johnston, G. C., Ringe, D., Singer, R. A., & Werner-Washburne, M. (2004).  
540 “Sleeping Beauty”: Quiescence in *Saccharomyces cerevisiae*. *Microbiology and Molecular*  
541 *Biology Reviews*. <https://doi.org/10.1128/mmbr.68.2.187-206.2004>
- 542 Huang, W. E., Li, M., Jarvis, R. M., Goodacre, R., & Banwart, S. A. (2010). Shining Light on the  
543 Microbial World: The Application of Raman Microspectroscopy. *Advances in Applied*  
544 *Microbiology*, 70, 153–186. [https://doi.org/10.1016/S0065-2164\(10\)70005-8](https://doi.org/10.1016/S0065-2164(10)70005-8)
- 545 Jia, K., Zhang, Y., & Li, Y. (2010). Systematic engineering of microorganisms to improve alcohol  
546 tolerance. *Engineering in Life Sciences*, 10(5), 422–429.  
547 <https://doi.org/10.1002/elsc.201000076>
- 548 Kassambara, A. (n.d.). “ggplot2” Based Publication Ready Plots [R package ggpubr version 0.2.5].  
549 Comprehensive R Archive Network (CRAN).
- 550 Liu, H., Zhang, Z., Liu, S., Yan, L., Liu, T., & Zhang, T. (2015). Joint Baseline-Correction and Denoising  
551 for Raman Spectra. *Applied Spectroscopy*, 69(9), 1013–1022. <https://doi.org/10.1366/14-07760>
- 552 Lowery, N. V., McNally, L., Ratcliff, W. C., & Brown, S. P. (2017). Division of labor, bet hedging, and  
553 the evolution of mixed biofilm investment strategies. *MBio*, 8(4).  
554 <https://doi.org/10.1128/mBio.00672-17>
- 555 Nijkamp, J. F., van den Broek, M., Datema, E., de Kok, S., Bosman, L., Luttkik, M. A., Daran-Lapujade,  
556 P., Vongsangnak, W., Nielsen, J., Heijne, W. H. M., Klaassen, P., Paddon, C. J., Platt, D., Kötter,  
557 P., van Ham, R. C., Reinders, M. J. T., Pronk, J. T., de Ridder, D., & Daran, J. M. (2012). De novo  
558 sequencing, assembly and analysis of the genome of the laboratory strain *Saccharomyces*  
559 *cerevisiae* CEN.PK113-7D, a model for modern industrial biotechnology. *Microbial Cell*  
560 *Factories*, 11, 36. <https://doi.org/10.1186/1475-2859-11-36>
- 561 Porter, J., Edwards, C., & Pickup, R. W. (1995). Rapid assessment of physiological status in  
562 *Escherichia coli* using fluorescent probes. *Journal of Applied Bacteriology*, 79(4), 399–408.  
563 <https://doi.org/10.1111/j.1365-2672.1995.tb03154.x>
- 564 Props, R., Monsieurs, P., Mysara, M., Clement, L., & Boon, N. (2016). Measuring the biodiversity of  
565 microbial communities by flow cytometry. *Methods in Ecology and Evolution*, 7(11), 1376–  
566 1385. <https://doi.org/10.1111/2041-210X.12607>
- 567 R Core Team 3.6.2. (2019). *R: A Language and Environment for Statistical Computing*. R Foundation  
568 for Statistical Computing.
- 569 Read, D. S., & Whiteley, A. S. (2015). Chemical fixation methods for Raman spectroscopy-based  
570 analysis of bacteria. *Journal of Microbiological Methods*.  
571 <https://doi.org/10.1016/j.mimet.2014.12.008>
- 572 Ron, E. Z. (2013). Bacterial stress response. In *The Prokaryotes: Prokaryotic Physiology and*  
573 *Biochemistry*. [https://doi.org/10.1007/978-3-642-30141-4\\_79](https://doi.org/10.1007/978-3-642-30141-4_79)
- 574 RStudio team. (2019). *RStudio: Integrated Development for R* (1.2.1335).
- 575 Świącilo, A. (2016). Cross-stress resistance in *Saccharomyces cerevisiae* yeast—new insight into an  
576 old phenomenon. *Cell Stress and Chaperones*. <https://doi.org/10.1007/s12192-016-0667-7>

- 577 Tang, M., McEwen, G. D., Wu, Y., Miller, C. D., & Zhou, A. (2013). Characterization and analysis of  
578 mycobacteria and Gram-negative bacteria and co-culture mixtures by Raman  
579 microspectroscopy, FTIR, and atomic force microscopy. *Analytical and Bioanalytical Chemistry*,  
580 405(5), 1577–1591. <https://doi.org/10.1007/s00216-012-6556-8>
- 581 Tanniche, I., Collakova, E., Denbow, C., & Senger, R. S. (2020). Characterizing metabolic stress-  
582 induced phenotypes of *Synechocystis* PCC6803 with Raman spectroscopy. *PeerJ*, 8, e8535.  
583 <https://doi.org/10.7717/peerj.8535>
- 584 Teng, L., Wang, X., Wang, X., Gou, H., Ren, L., Wang, T., Wang, Y., Ji, Y., Huang, W. E., & Xu, J. (2016).  
585 Label-free, rapid and quantitative phenotyping of stress response in *E. coli* via ramanome.  
586 *Scientific Reports*, 6(1), 34359. <https://doi.org/10.1038/srep34359>
- 587 Veening, J.-W., Smits, W. K., & Kuipers, O. P. (2008). Bistability, Epigenetics, and Bet-Hedging in  
588 Bacteria. *Annual Review of Microbiology*, 62(1), 193–210.  
589 <https://doi.org/10.1146/annurev.micro.62.081307.163002>
- 590 Verduyn, C., Postma, E., Scheffers, W. A., & Van Dijken, J. P. (1992). Effect of benzoic acid on  
591 metabolic fluxes in yeasts: A continuous-culture study on the regulation of respiration and  
592 alcoholic fermentation. *Yeast*, 8(7), 501–517. <https://doi.org/10.1002/yea.320080703>
- 593 Villanueva, R. A. M., Chen, Z. J., & Wickham, H. (2016). *ggplot2: Elegant Graphics for Data Analysis*  
594 *Using the Grammar of Graphics*. Springer-Verlag New York.  
595 <https://doi.org/10.1080/15366367.2019.1565254>
- 596 Wahl, J., Sjö Dahl, M., & Ramser, K. (2020). Single-Step Preprocessing of Raman Spectra Using  
597 Convolutional Neural Networks. *Applied Spectroscopy*, 74(4), 427–438.  
598 <https://doi.org/10.1177/0003702819888949>
- 599 Wanderley, B. M. S., Araújo, D. S., Quiroga, M. V., Amado, A. M., Neto, A. D. D., Sarmento, H., Metz,  
600 S. D., & Unrein, F. (2019). FlowDiv: A new pipeline for analyzing flow cytometric diversity. *BMC*  
601 *Bioinformatics*. <https://doi.org/10.1186/s12859-019-2787-4>
- 602 Wesche, A. M., Gurtler, J. B., Marks, B. P., & Ryser, E. T. (2009). Stress, sublethal injury, resuscitation,  
603 and virulence of bacterial foodborne pathogens. In *Journal of Food Protection*.  
604 <https://doi.org/10.4315/0362-028X-72.5.1121>
- 605 Wu, H., Volponi, J. V., Oliver, A. E., Parikh, A. N., Simmons, B. A., & Singh, S. (2011). In vivo lipidomics  
606 using single-cell Raman spectroscopy. *Proceedings of the National Academy of Sciences of the*  
607 *United States of America*, 108(9), 3809–3814. <https://doi.org/10.1073/pnas.1009043108>
- 608 Zid, B. M., & O’Shea, E. K. (2014). Promoter sequences direct cytoplasmic localization and translation  
609 of mRNAs during starvation in yeast. *Nature*, 514(7520), 117–121.  
610 <https://doi.org/10.1038/nature13578>

## 612 Declarations

### 613 Data availability

614 The raw data and code to reproduce the analysis shown in this manuscript can be found in the  
615 repository [https://github.com/CMET-UGent/Raman\\_PhenoDiv](https://github.com/CMET-UGent/Raman_PhenoDiv)

616 The dataset from Teng et al. 2016 was used to validate alpha and beta-diversity calculations, as well  
617 as the 'subpopulation type' definition.

### 618 Competing interests

619 The authors declare no competing interests.

### 620 Author contributions

621 CGT wrote the paper with contributions from RP, BZ, FD and NB. BZ and FD cultivated, harvested and  
622 sorted the *S. cerevisiae* cells. MS cultivated and harvested *C. necator*, *M. extorquens*, *Y. lipolytica* and  
623 *K. phaffii*. CGT collected the Raman data. CGT performed the data analysis with the help of RP. CGT,  
624 RP, BZ, FD and NB designed the study. All authors read and approved the final version of the  
625 manuscript.

### 626 Acknowledgements

627 The authors thank the funding that made this research possible. CGT is funded by the Flemish Fund  
628 for Scientific Research (FWO G020119N) and by the Geconcerteerde Onderzoeksacties (GOA) research  
629 grant from Ghent University (BOF15/GOA/006). RP is supported by the Flemish Fund for Scientific  
630 Research (FWO). BZ is supported by a post-doctoral grant through an Era-CobioTech project  
631 ("ComRaDes" Computation for Rational Design: From Lab to Production with Success). MS is  
632 supported by the Catalisti cluster SBO project CO2PERATE ("All renewable CCU based on formic acid  
633 integrated in an industrial microgrid"), with the financial support of VLAIO, Belgium (Flemish Agency  
634 for Innovation and Entrepreneurship). This project has received funding from the European Union's  
635 Horizon 2020 research and innovation programme under grant 722361.
